# Supplementary material
Source: PubMed Central journal article supplement (PMC6727204)
Supplement: NIHMS1538476-supplement-1.pdf [file NIHMS1538476-supplement-1.pdf]

**Cell Reports, Volume 28**

**Supplemental Information**

**CRISPR-Cas9 Gene Editing  
in Lizards through Microinjection  
of Unfertilized Oocytes**

**Ashley M. Rasys, Sungdae Park, Rebecca E. Ball, Aaron J. Alcala, James D. Lauderdale, and Douglas B. Menke**

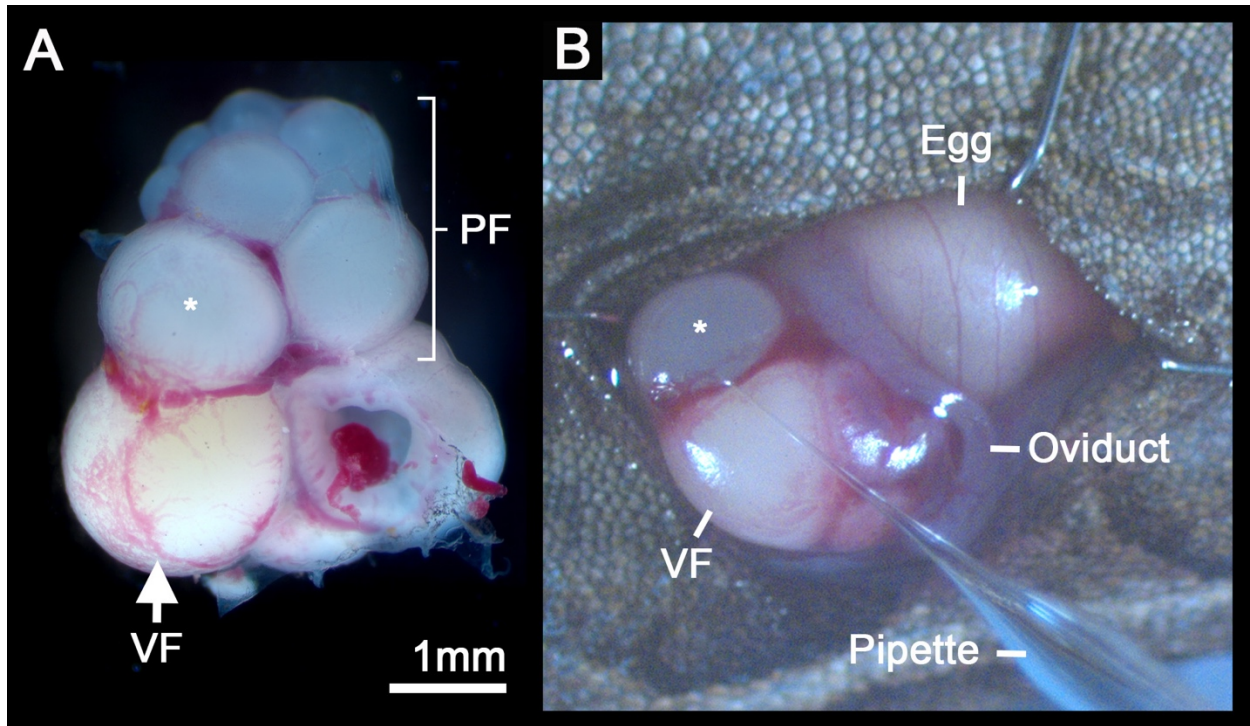

**Figure S1, Related to Figure 1.** Anole lizard ovary. (A) Dissected ovary showing previtellogenic (PF) and vitellogenic (VF) follicles. (B) Same ovary prior to dissection showing microinjection of a 1.5 mm diameter follicle (asterisk in panels A and B).

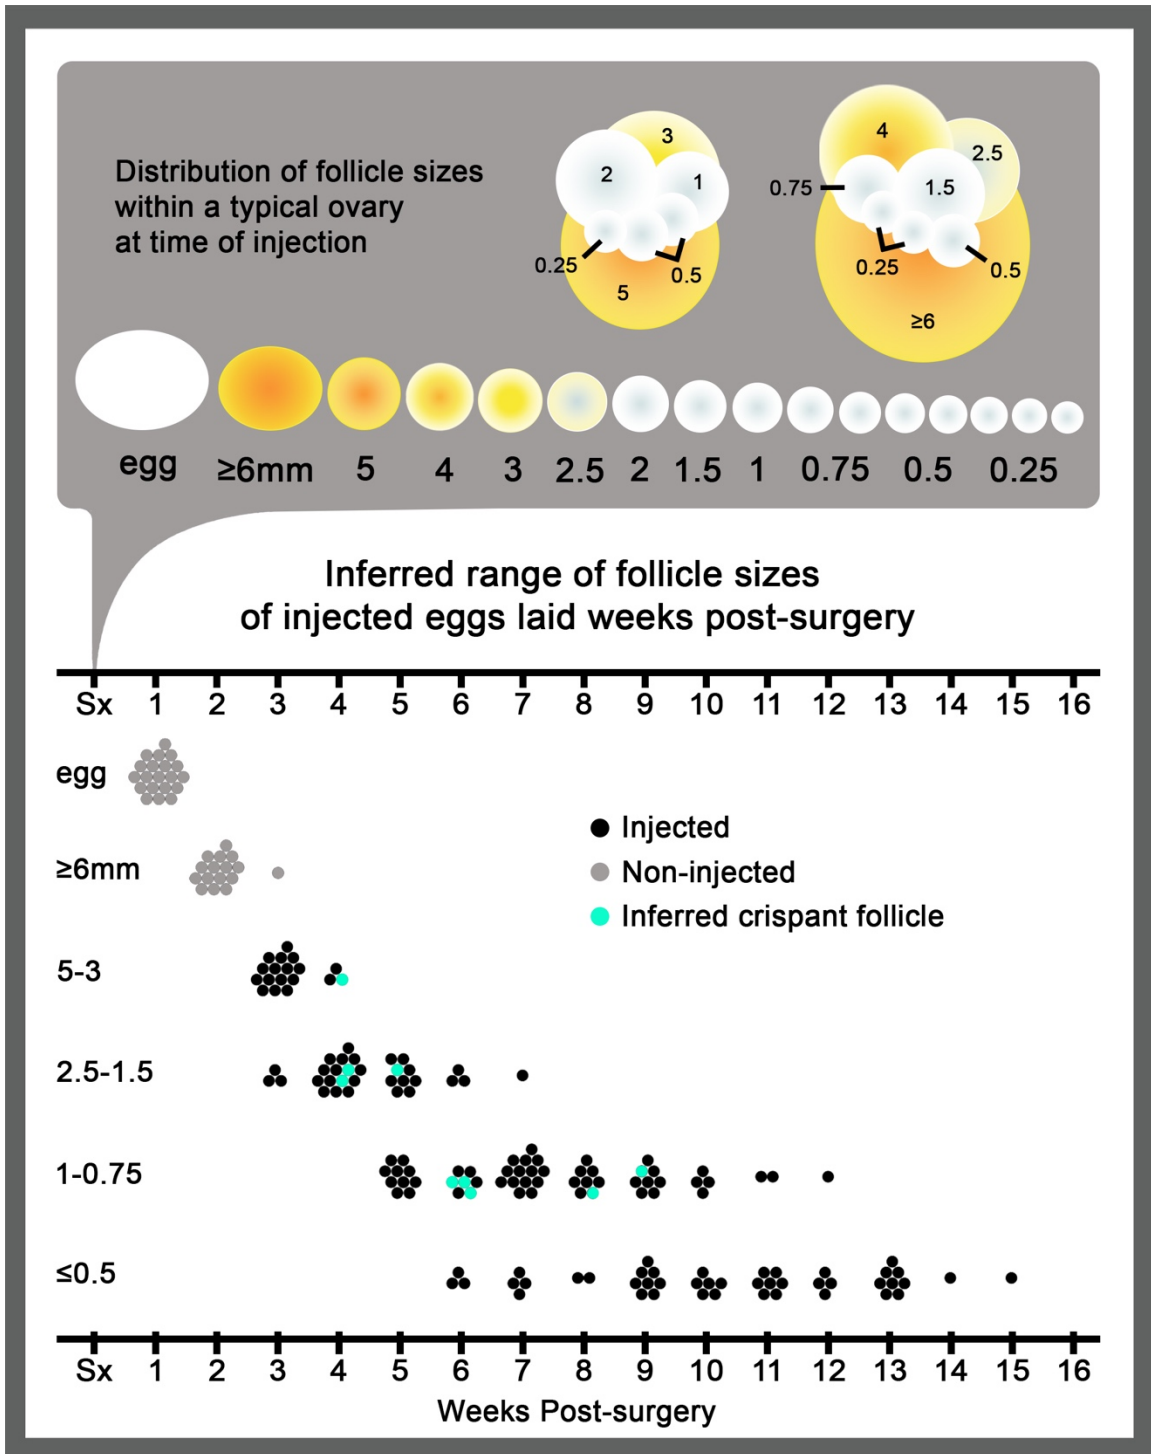

**Figure S2, Related to Figure 2.** Inferred relationship between follicle size and crispants. (Top) the distribution of follicles sizes within ovaries at time of injection depicted as a “follicle train.” (Below) a distribution graph showing inferred follicle sizes over weeks post-surgery. Non-injected eggs and large yolky follicles are shown in grey, while injected follicles are in black and follicles that likely produced crispant lizards are in cyan.
